# Supplementary material for: Carbon isotope discrimination and the factors affecting it in a summer maize field under different tillage systems
Source: PeerJ. 2022 Feb 11;10:e12891. doi: 10.7717/peerj.12891 (PMC8842653; doi:10.7717/peerj.12891)
Supplement: Supplemental Information 1 — The carbon isotope discrimination and the factors affecting it in a summer maize field under different tillage systems. [file peerj-10-12891-s001.xlsx]

## Sheet: Climate change
The daily precipitation and mean temperature
	temperature			precipitation					temperature			precipitation
2016-06-10	26.22		2016-06-10	0				2017-06-10	24.45		2017-06-10	7.6
2016-06-11	28.06		2016-06-11	0				2017-06-11	24.21		2017-06-11	0
2016-06-12	26.61		2016-06-12	0				2017-06-12	25.01		2017-06-12	0
2016-06-13	25.02		2016-06-13	1.3				2017-06-13	25.82		2017-06-13	0
2016-06-14	22.61		2016-06-14	3.5				2017-06-14	25.99		2017-06-14	0
2016-06-15	22.36		2016-06-15	1.6				2017-06-15	26.51		2017-06-15	0
2016-06-16	25.84		2016-06-16	1				2017-06-16	27.59		2017-06-16	0
2016-06-17	28.57		2016-06-17	0.8				2017-06-17	28.83		2017-06-17	0
2016-06-18	28.71		2016-06-18	0.5				2017-06-18	27.42		2017-06-18	0
2016-06-19	30.25		2016-06-19	0.3				2017-06-19	28.04		2017-06-19	0
2016-06-20	30.6		2016-06-20	0.3				2017-06-20	25.33		2017-06-20	10.7
2016-06-21	30.13		2016-06-21	0.1				2017-06-21	25.77		2017-06-21	5.6
2016-06-22	29.4		2016-06-22	0				2017-06-22	23.95		2017-06-22	7
2016-06-23	24.68		2016-06-23	9.7				2017-06-23	23.99		2017-06-23	2.7
2016-06-24	25		2016-06-24	6.9				2017-06-24	24.79		2017-06-24	0.2
2016-06-25	26.3		2016-06-25	0.5				2017-06-25	24.73		2017-06-25	0
2016-06-26	26.35		2016-06-26	0.3				2017-06-26	26.48		2017-06-26	0
2016-06-27	26.96		2016-06-27	0.2				2017-06-27	27.84		2017-06-27	0
2016-06-28	24.16		2016-06-28	5.8				2017-06-28	29.44		2017-06-28	0
2016-06-29	26.11		2016-06-29	0				2017-06-29	29.14		2017-06-29	0
2016-06-30	29.3		2016-06-30	0.6				2017-06-30	27.74		2017-06-30	0
2016-07-01	25.63		2016-07-01	36.5				2017-07-01	28		2017-07-01	0
2016-07-02	27.36		2016-07-02	0				2017-07-02	29.44		2017-07-02	0
2016-07-03	27.58		2016-07-03	0.1				2017-07-03	31.27		2017-07-03	0
2016-07-04	25.82		2016-07-04	0				2017-07-04	29.76		2017-07-04	0
2016-07-05	26.25		2016-07-05	0				2017-07-05	29.14		2017-07-05	0.4
2016-07-06	26.92		2016-07-06	0				2017-07-06	25.92		2017-07-06	36.3
2016-07-07	27.61		2016-07-07	4.5				2017-07-07	27.96		2017-07-07	2.2
2016-07-08	28.48		2016-07-08	0				2017-07-08	30.29		2017-07-08	0
2016-07-09	26.77		2016-07-09	0				2017-07-09	28.82		2017-07-09	0
2016-07-10	28.14		2016-07-10	0				2017-07-10	29.19		2017-07-10	0
2016-07-11	28.74		2016-07-11	0				2017-07-11	30.78		2017-07-11	0
2016-07-12	27.32		2016-07-12	6.1				2017-07-12	31.12		2017-07-12	0
2016-07-13	28.52		2016-07-13	0.9				2017-07-13	31.24		2017-07-13	0
2016-07-14	27.04		2016-07-14	22.6				2017-07-14	29.99		2017-07-14	0
2016-07-15	22.1		2016-07-15	30.1				2017-07-15	26.4		2017-07-15	18.8
2016-07-16	23.7		2016-07-16	0				2017-07-16	26.17		2017-07-16	9.6
2016-07-17	26.27		2016-07-17	0				2017-07-17	28.19		2017-07-17	14.4
2016-07-18	27.66		2016-07-18	1.9				2017-07-18	26.06		2017-07-18	44.1
2016-07-19	26.74		2016-07-19	6.8				2017-07-19	28.21		2017-07-19	2.9
2016-07-20	26.07		2016-07-20	65.9				2017-07-20	30.72		2017-07-20	0
2016-07-21	27.17		2016-07-21	5.8				2017-07-21	30.67		2017-07-21	0
2016-07-22	28.88		2016-07-22	5				2017-07-22	31.42		2017-07-22	0
2016-07-23	30.79		2016-07-23	0				2017-07-23	32.04		2017-07-23	0
2016-07-24	31.77		2016-07-24	0				2017-07-24	30.99		2017-07-24	5.5
2016-07-25	32.24		2016-07-25	3.6				2017-07-25	29.61		2017-07-25	0
2016-07-26	29.68		2016-07-26	0				2017-07-26	28.64		2017-07-26	7.2
2016-07-27	28.14		2016-07-27	0				2017-07-27	26.35		2017-07-27	59.9
2016-07-28	29.48		2016-07-28	0.8				2017-07-28	26.25		2017-07-28	18.9
2016-07-29	31.07		2016-07-29	0				2017-07-29	22.77		2017-07-29	10.5
2016-07-30	30.12		2016-07-30	0				2017-07-30	24.13		2017-07-30	5.6
2016-07-31	29.66		2016-07-31	0.6				2017-07-31	27.7		2017-07-31	0.5
2016-08-01	26.15		2016-08-01	40.4				2017-08-01	29.66		2017-08-01	0
2016-08-02	27.98		2016-08-02	0				2017-08-02	27.98		2017-08-02	21
2016-08-03	27.12		2016-08-03	0.6				2017-08-03	28.7		2017-08-03	1.3
2016-08-04	27.72		2016-08-04	3.9				2017-08-04	29.75		2017-08-04	0
2016-08-05	28.42		2016-08-05	0.9				2017-08-05	29.99		2017-08-05	0
2016-08-06	27.31		2016-08-06	9.2				2017-08-06	30.42		2017-08-06	0
2016-08-07	27.07		2016-08-07	1.7				2017-08-07	30.1		2017-08-07	0
2016-08-08	26.8		2016-08-08	3.1				2017-08-08	29.25		2017-08-08	0
2016-08-09	28.71		2016-08-09	0				2017-08-09	27.46		2017-08-09	4.1
2016-08-10	29.16		2016-08-10	0				2017-08-10	27.33		2017-08-10	0.1
2016-08-11	30.27		2016-08-11	0				2017-08-11	29.44		2017-08-11	0
2016-08-12	31.13		2016-08-12	0				2017-08-12	27.64		2017-08-12	0.3
2016-08-13	30.2		2016-08-13	0				2017-08-13	26.73		2017-08-13	0
2016-08-14	28.86		2016-08-14	3.6				2017-08-14	26.96		2017-08-14	0
2016-08-15	28.61		2016-08-15	0				2017-08-15	26.81		2017-08-15	0
2016-08-16	24.33		2016-08-16	48				2017-08-16	27.95		2017-08-16	0
2016-08-17	24.38		2016-08-17	64.8				2017-08-17	28.41		2017-08-17	0
2016-08-18	28.02		2016-08-18	0				2017-08-18	27.91		2017-08-18	6.8
2016-08-19	26.63		2016-08-19	22.3				2017-08-19	25.66		2017-08-19	21.1
2016-08-20	26.51		2016-08-20	0.1				2017-08-20	27.07		2017-08-20	0
2016-08-21	26.9		2016-08-21	0				2017-08-21	28.02		2017-08-21	0
2016-08-22	28.22		2016-08-22	0				2017-08-22	28.78		2017-08-22	0
2016-08-23	27.55		2016-08-23	0				2017-08-23	29.6		2017-08-23	0
2016-08-24	28.41		2016-08-24	0				2017-08-24	29.8		2017-08-24	0
2016-08-25	25.17		2016-08-25	2.4				2017-08-25	26		2017-08-25	0
2016-08-26	23.78		2016-08-26	0				2017-08-26	23.66		2017-08-26	0
2016-08-27	21.9		2016-08-27	0				2017-08-27	26.51		2017-08-27	0
2016-08-28	23.45		2016-08-28	0				2017-08-28	24		2017-08-28	2.1
2016-08-29	23.83		2016-08-29	0				2017-08-29	20.87		2017-08-29	2
2016-08-30	24.61		2016-08-30	0				2017-08-30	18.92		2017-08-30	16.4
2016-08-31	25.18		2016-08-31	0				2017-08-31	22.54		2017-08-31	0
2016-09-01	25.71		2016-09-01	0				2017-09-01	22.49		2017-09-01	0
2016-09-02	24.29		2016-09-02	0				2017-09-02	23.08		2017-09-02	0
2016-09-03	24.36		2016-09-03	0				2017-09-03	22.43		2017-09-03	0
2016-09-04	25.4		2016-09-04	0				2017-09-04	23.07		2017-09-04	1.9
2016-09-05	25.99		2016-09-05	0				2017-09-05	23.68		2017-09-05	4.3
2016-09-06	25.92		2016-09-06	0				2017-09-06	22.38		2017-09-06	1.6
2016-09-07	22.96		2016-09-07	2.5				2017-09-07	23.91		2017-09-07	0
2016-09-08	23.34		2016-09-08	0				2017-09-08	25.59		2017-09-08	0
2016-09-09	24.81		2016-09-09	0				2017-09-09	25.61		2017-09-09	0.3
2016-09-10	24.22		2016-09-10	0.5				2017-09-10	21.22		2017-09-10	3
2016-09-11	23.13		2016-09-11	1.1				2017-09-11	23.31		2017-09-11	0
2016-09-12	23.56		2016-09-12	0				2017-09-12	23.77		2017-09-12	0
2016-09-13	22.12		2016-09-13	0.9				2017-09-13	23.71		2017-09-13	0
2016-09-14	23.92		2016-09-14	0				2017-09-14	23.12		2017-09-14	0
2016-09-15	25.35		2016-09-15	0				2017-09-15	24.56		2017-09-15	0
2016-09-16	24.57		2016-09-16	0				2017-09-16	21.74		2017-09-16	0.5
2016-09-17	23.96		2016-09-17	0				2017-09-17	23.06		2017-09-17	0.1
2016-09-18	22.64		2016-09-18	0				2017-09-18	24.08		2017-09-18	0
2016-09-19	21.95		2016-09-19	0				2017-09-19	25.6		2017-09-19	0
2016-09-20	19.67		2016-09-20	0				2017-09-20	24.36		2017-09-20	0
2016-09-21	20.09		2016-09-21	0				2017-09-21	23.14		2017-09-21	0
2016-09-22	20.67		2016-09-22	0				2017-09-22	24		2017-09-22	0
2016-09-23	23.24		2016-09-23	0				2017-09-23	25.57		2017-09-23	0
2016-09-24	22.64		2016-09-24	0				2017-09-24	25.14		2017-09-24	0
2016-09-25	23.87		2016-09-25	0				2017-09-25	23.6		2017-09-25	0
2016-09-26	22.13		2016-09-26	10.9				2017-09-26	23.53		2017-09-26	0.4
2016-09-27	21.82		2016-09-27	0.4				2017-09-27	21.87		2017-09-27	0
2016-09-28	17.23		2016-09-28	0.3				2017-09-28	18.83		2017-09-28	0
2016-09-29	16.51		2016-09-29	0				2017-09-29	19.4		2017-09-29	0
2016-09-30	17.8		2016-09-30	0				2017-09-30	21.6		2017-09-30	19.3
2016-10-01	21.25		2016-10-01	0				2017-10-01	16.77		2017-10-01	9.5
			2016	442.2							2017	386.7

## Sheet: Δ13C
Δ13C
2016								2016
Pre-filling	L	M	U					Post-filling	L	M	U
CT0	5.43	4.9	5.32	①				CT0	5.23	4.91	5.21	①
	5.44	4.95	5.35	②					5.34	4.99	5.26	②
	5.51	5.03	5.41	③					5.39	5.01	5.37	③
SS0	5.67	5.03	5.45	①				SS0	5.43	4.92	5.37	①
	5.59	5.14	5.53	②					5.53	4.96	5.41	②
	5.72	5.16	5.58	③					5.57	5.18	5.54	③
RT0	5.21	4.72	5.12	①				RT0	5.13	4.83	5.17	①
	5.26	4.78	5.24	②					5.21	4.9	5.21	②
	5.37	4.9	5.3	③					5.23	4.91	5.34	③
NT0	5.13	4.68	5.05	①				ZT0	5.02	4.63	4.92	①
	5.19	4.78	5.15	②					5.11	4.73	5.03	②
	5.28	4.79	5.19	③					5.11	4.77	5.08	③
CTS	5.51	5.03	5.4	①				CTS	5.32	4.95	5.25	①
	5.53	5.11	5.42	②					5.39	5.01	5.33	②
	5.64	5.25	5.5	③					5.52	5.13	5.38	③
SSS	5.68	5.21	5.52	①				SSS	5.57	5.12	5.51	①
	5.78	5.28	5.59	②					5.65	5.21	5.53	②
	5.79	5.32	5.72	③					5.67	5.24	5.58	③
RTS	5.35	4.92	5.28	①				RTS	5.27	4.88	5.23	①
	5.39	4.99	5.36	②					5.29	4.93	5.28	②
	5.52	5.03	5.38	③					5.37	4.95	5.3	③
NTS	5.18	4.75	5.13	①				ZTS	5.13	4.71	5.02	①
	5.27	4.79	5.21	②					5.21	4.77	5.15	②
	5.3	4.89	5.23	③					5.23	4.77	5.22	③
2017	Δ13C							2017
Pre-filling	L	M	U					Post-filling	L	M	U
CT0	5.25	4.82	5.16	①				CT0	5.08	4.65	4.89	①
	5.36	4.9	5.23	②					5.22	4.76	4.95	②
	5.38	4.95	5.24	③					5.27	4.78	5.1	③
SS0	5.37	4.89	5.19	①				SS0	5.16	4.73	5.01	①
	5.45	4.97	5.27	②					5.25	4.83	5.09	②
	5.47	5.02	5.29	③					5.25	4.87	5.11	③
RT0	5.18	4.69	5.05	①				RT0	5.05	4.47	4.79	①
	5.26	4.88	5.16	②					5.15	4.59	4.93	②
	5.28	4.92	5.18	③					5.19	4.59	5.01	③
NT0	5.11	4.65	4.99	①				ZT0	4.92	4.42	4.79	①
	5.12	4.75	5.05	②					5.02	4.53	4.83	②
	5.25	4.76	5.08	③					5.09	4.55	4.96	③
CTS	5.42	5.09	5.32	①				CTS	5.14	4.65	4.99	①
	5.51	5.17	5.45	②					5.25	4.81	5.09	②
	5.54	5.19	5.46	③					5.27	4.85	5.13	③
SSS	5.52	5.16	5.39	①				SSS	5.23	4.78	5.11	①
	5.61	5.19	5.51	②					5.32	4.96	5.21	②
	5.64	5.31	5.54	③					5.35	5.08	5.24	③
RTS	5.38	4.92	5.18	①				RTS	5.05	4.52	4.87	①
	5.41	4.96	5.23	②					5.15	4.69	5.08	②
	5.5	5.15	5.37	③					5.28	4.77	5.08	③
NTS	5.29	4.78	5.01	①				ZTS	5.03	4.48	4.89	①
	5.39	4.83	5.06	②					5.09	4.58	5.01	②
	5.43	4.94	5.2	③					5.21	4.65	5.04	③

## Sheet: Soil water content
soil water content
2016			CT0		SS0		RT0		NT0				2016			CTS		SSS		RTS		NTS
Pre-filling	40-60	①	18.23		18.28		17.58		17.19				Pre-filling	40-60	①	18.63		18.83		18.01		19.65
		②	18.71		18.86		17.95		17.65						②	19.03		19.11		18.33		20.11
		③	18.98		19.29		18.56		17.69						③	19.19		19.54		18.38		20.33
	20-40	①	14.99		16.31		15.62		15.53					20-40	①	15.63		16.91		16.77		16.21
		②	15.61		16.63		16.11		15.79						②	16.05		17.23		16.91		16.57
		③	15.99		17.13		16.3		16.32						③	16.23		17.4		17.29		16.78
	10-20	①	17.47		18.25		19.51		18.67					10-20	①	18.42		19.02		19.72		19.05
		②	17.91		18.63		19.93		19.11						②	18.93		19.33		20.11		19.43
		③	18.23		18.68		20.11		19.19						③	19.29		19.49		20.2		19.66
	0-10	①	18.42		19.55		21.54		20.15					0-10	①	19.63		21.17		22.53		21.53
		②	18.94		20.09		21.95		20.49						②	20.03		21.45		22.81		21.79
		③	19.67		20.3		22.18		20.65						③	20.19		21.61		23.27		22.26
Post-filling	40-60	①	15.49		16.02		15.37		15.02				Post-filling	40-60	①	16.53		16.77		15.89		17.37
		②	15.93		16.31		15.79		15.41						②	16.81		16.81		16.11		17.65
		③	16.22		16.39		15.97		15.53						③	17.3		17.45		16.69		17.75
	20-40	①	12.39		13.18		11.89		11.43					20-40	①	13.08		14.28		12.02		11.79
		②	12.86		13.63		12.23		11.81						②	13.35		14.43		12.18		11.88
		③	13.27		13.96		12.36		12.07						③	13.5		15.03		12.64		12.42
	10-20	①	14.18		15.17		16.21		16.01					10-20	①	16.17		16.57		17.71		16.76
		②	14.61		15.56		16.63		16.09						②	16.41		17.18		18.06		16.89
		③	14.89		15.74		16.87		16.35						③	16.77		17.22		18.17		17.59
	0-10	①	17.02		17.35		19.03		18.31					0-10	①	17.18		18.25		19.75		18.75
		②	17.31		17.74		19.31		18.64						②	17.29		18.54		19.88		18.89
		③	17.36		17.98		19.41		18.82						③	18.06		18.59		20.28		19.48
2017			CT0		SS0		RT0		NT0				2017			CTS		SSS		RTS		NTS
Pre-filling	40-60	①	18.16		18.25		17.52		17.18				Pre-filling	40-60	①	19.05		19.33		18.77		19.75
		②	18.57		18.83		17.87		17.56						②	19.19		19.48		18.82		19.94
		③	19.07		19.2		18.04		17.73						③	19.69		19.72		19.26		20.43
	20-40	①	15.88		16.58		15.43		15.02					20-40	①	16.33		16.85		16.03		15.88
		②	16.19		17.01		15.92		15.31						②	16.45		17.08		16.11		15.99
		③	16.32		17.26		16.26		15.45						③	16.84		17.55		16.49		16.19
	10-20	①	17.11		17.81		19.91		19.01					10-20	①	18.59		19.25		20.33		19.63
		②	17.53		18.13		20.23		19.35						②	18.71		19.33		20.49		19.82
		③	17.74		18.3		20.34		19.45						③	18.95		19.68		20.53		19.98
	0-10	①	18.73		19.28		22.01		20.71					0-10	①	19.78		20.02		22.88		21.75
		②	19.12		19.69		22.33		21.12						②	19.86		20.11		22.93		21.83
		③	19.36		19.89		22.5		21.2						③	20.39		20.5		23.4		22.39
Post-filling	40-60	①	14.01		14.23		13.67		13.28				Post-filling	40-60	①	14.91		15.58		14.71		15.58
		②	14.3		14.65		13.91		13.63						②	14.99		15.69		14.85		15.69
		③	14.44		14.83		14.36		14.25						③	15.49		16.1		15.47		16.31
	20-40	①	12.19		12.51		11.87		11.24					20-40	①	13.02		13.33		12.72		12.71
		②	12.56		12.95		12.28		11.63						②	13.18		13.41		12.86		12.79
		③	12.78		13.21		12.42		11.84						③	13.94		13.79		13.48		13.05
	10-20	①	13.78		14.27		15.03		14.51					10-20	①	14.88		15.03		16.02		15.43
		②	14.15		14.72		15.31		14.93						②	14.96		15.11		16.15		15.61
		③	14.34		14.9		15.44		15.17						③	15.25		15.7		16.52		16.27
	0-10	①	14.68		15.47		16.87		16.15					0-10	①	16.01		16.88		18.66		17.78
		②	15.12		15.79		17.05		16.39						②	16.12		16.96		18.75		17.93
		③	15.23		16.38		17.65		16.72						③	16.41		17.7		19.02		18.26

## Sheet: Leaf area index
Leaf area index
2016
Pre-filling	CT0		SS0		RT0		ZT0			Pre-filling	CTS		SSS		RTS		ZTS
①	5.28		4.78		4.37		5.43			①	4.87		4.98		4.63		5.63
②	5.39		5.05		4.58		5.59			②	5.06		5.09		4.85		5.85
③	5.59		5.14		4.67		5.81			③	5.13		5.35		4.92		6.16
Post-filling										Post-filling
①	3.83		3.95		3.62		3.37			①	4.03		4.17		3.77		3.68
②	4.08		4.17		3.85		3.55			②	4.25		4.38		3.95		3.87
③	4.12		4.24		3.9		3.61			③	4.32		4.5		3.98		3.91
2017
Pre-filling	CT0		SS0		RT0		ZT0			Pre-filling	CTS		SSS		RTS		ZTS
①	4.31		4.38		4.02		4.55			①	4.19		4.48		4.07		4.77
②	4.53		4.57		4.25		4.73			②	4.41		4.72		4.31		4.91
③	4.63		4.67		4.3		4.82			③	4.48		4.84		4.46		5.14
Post-filling										Post-filling
①	3.48		3.72		3.15		1.25			①	3.59		3.83		3.52		3.08
②	3.59		3.87		3.35		1.48			②	3.78		3.98		3.7		3.31
③	3.85		3.9		3.43		1.62			③	3.85		4.22		3.76		3.39

## Sheet:  Air temperature
Air temperature			CT0		SS0		RT0		ZT0
2016	L	①	32.9		33.3		32.8		31.8
Pre-filling		②	33.2		33.4		32.9		32.1
		③	33.2		33.8		33.3		32.1
	M	①	32.8		32.7		32.8		32.1
		②	33		32.8		33.2		32.4
		③	33.2		33.2		33.3		32.4
	U	①	32.3		32.5		33.3		32
		②	32.7		32.8		33.6		32.1
		③	32.8		32.8		33.6		32.5
			CTS		SSS		RTS		ZTS
		①	33.3		33		33.1		32.2
		②	33.4		33.1		33.1		32.5
		③	33.8		33.5		33.4		32.5
		①	32.5		32.5		32.6		32.5
		②	32.6		32.9		32.9		32.6
		③	33		33		32.9		33
		①	32		32.4		32.5		32.5
		②	32.2		32.8		32.8		32.9
		③	32.4		32.9		32.8		33
2016
Post-filling			CT0		SS0		RT0		ZT0
	L	①	29.7		29.5		29.5		29.8
		②	30		29.5		29.6		30.2
		③	30		29.8		30		30.3
	M	①	29.6		29.1		29.3		29.8
		②	29.7		29.4		29.6		30.1
		③	30.1		29.4		29.6		30.1
	U	①	29.3		28.5		28.7		29.5
		②	29.3		28.5		29.1		29.6
		③	29.6		28.8		29.2		30
			CTS		SSS		RTS		ZTS
	L	①	31.2		30		29.7		31.7
		②	31.2		30.1		30		32
		③	31.5		30.5		30		32
	M	①	31.2		31		29.1		29.6
		②	31.6		31.3		29.4		30
		③	31.7		31.3		29.4		30.1
	U	①	30.6		30.8		31.1		30.3
		②	31		31.1		31.2		30.3
		③	31.1		31.1		31.3		30.6
			CT0		SS0		RT0		ZT0
2017	L	①	32.9		35.6		35.8		34.3
Pre-filling		②	33.2		36		35.9		34.6
		③	33.2		36.1		36.3		34.6
	M	①	33.6		35		34.6		34.8
		②	33.6		35		34.6		34.8
		③	33.8		35.3		34.9		35.1
	U	①	34.1		32.8		32.8		35.2
		②	34.2		32.8		32.9		35.2
		③	34.6		33.1		33		35.5
			CTS		SSS		RTS		ZTS
	L	①	35.7		35.6		34.9		35.2
		②	36		35.9		34.9		35.2
		③	36		35.9		35.2		35.5
	M	①	35.1		33.8		33.8		34.7
		②	35.1		33.9		34.1		34.8
		③	35.4		34.3		34.1		34.9
	U	①	33.5		34.7		32.8		35.2
		②	33.6		34.7		32.8		35.2
		③	33.7		35		33.1		35.5
			CT0		SS0		RT0		ZT0
2017	L	①	29.3		28.7		29.1		29.5
Post-filling		②	29.6		28.7		29.1		29.5
		③	29.6		29		29.4		29.8
	M	①	28.9		28.3		28.4		29
		②	28.9		28.5		28.7		29.1
		③	29.2		28.7		28.7		29.5
	U	①	28		27.3		27.9		28.4
		②	28.3		27.3		27.9		28.5
		③	28.3		27.6		28.2		28.6
			CTS		SSS		RTS		ZTS
	L	①	29.8		30.7		30.5		30.4
		②	29.9		31		30.5		30.4
		③	30.3		31		30.8		30.7
	M	①	29.1		29.1		30.1		29.6
		②	29.1		29.1		30.1		29.7
		③	29.4		29.4		30.4		29.8
	U	①	28		28.2		28		29
		②	28.3		28.3		28.3		29
			28.3		28.7		28.3		29.3

## Sheet: Relative humidity 
Relative humidity			CT0		SS0		RT0		ZT0
2016	L	①	50.9		50.6		49.3		48.3
Pre-filling		②	51		50.7		49.5		48.6
		③	51.4		51.7		49.7		48.6
	M	①	47.3		45.5		46.7		42.7
		②	47.8		45.9		46.8		43
		③	48		46		47.5		43.3
	U	①	43.9		43.6		43.3		41.6
		②	44.1		44.2		43.8		41.9
		③	44.9		44.2		44		42.5
			CTS		SSS		RTS		ZTS
		①	48		47.2		45.6		46.1
		②	48.6		47.3		45.6		46.3
		③	48.9		48		46.5		47.1
		①	46.1		43		44.5		44.3
		②	46.3		43.2		44.7		44.6
		③	47.1		44		45.2		45.5
		①	44.8		45.3		43.6		43
		②	45.1		45.4		43.8		43.1
		③	45.7		46.1		44.6		43.5
2016
Post-filling			CT0		SS0		RT0		ZT0
	L	①	39.2		40.5		37.8		39.6
		②	39.3		40.6		37.9		39.9
		③	40.3		41.3		38.9		40.8
	M	①	38.5		40		35.2		37.1
		②	38.9		40.1		35.9		37.6
		③	39.9		40.5		36.3		37.8
	U	①	41.5		41.6		41.1		38.7
		②	41.9		41.9		41.2		38.9
		③	43.2		42.8		41.9		39.7
			CTS		SSS		RTS		ZTS
	L	①	39.2		40.1		42.1		41.2
		②	39.4		40.1		42.2		41.5
		③	40.2		40.7		42.6		42.1
	M	①	38.5		39.8		42.3		39.5
		②	38.5		40.1		42.6		39.8
		③	39.4		40.7		43.5		40.4
	U	①	40.1		40.3		39.2		40.5
		②	40.3		40.5		39.5		40.8
		③	40.8		41		39.8		41.4
			CT0		SS0		RT0		ZT0
2017	L	①	59.5		58.7		56.5		53.5
Pre-filling		②	59.8		59.3		56.9		53.7
		③	60.4		59.3		57.6		54.5
	M	①	53		50.3		48.7		49.6
		②	53.4		51.3		48.9		49.9
		③	53.5		51.4		49.7		50.8
	U	①	50.3		52.3		50.1		49.8
		②	50.8		53.3		50.3		50
		③	51		53.4		51.1		50.5
			CTS		SSS		RTS		ZTS
	L	①	54.7		54.3		54.1		51.8
		②	54.9		54.3		54.3		52.1
		③	56		55.2		54.8		52.7
	M	①	52.1		48.5		50.3		47.3
		②	52.3		48.9		50.7		47.5
		③	52.8		49		51.4		48.6
	U	①	51.5		48.6		49.3		48
		②	52.1		48.9		49.8		48.1
		③	52.4		49.8		50.3		48.5
			CT0		SS0		RT0		ZT0
2017	L	①	54.5		55.6		57.5		54.1
Post-filling		②	54.6		55.9		58.1		54.6
		③	55.3		56.8		58.4		54.8
	M	①	55.5		53.4		54.7		50.3
		②	56.1		53.9		54.9		50.5
		③	56.1		54.1		55.7		51
	U	①	56.7		56.5		54.1		51.8
		②	56.7		56.9		54.3		52.3
		③	57.3		57		55.1		52.5
			CTS		SSS		RTS		ZTS
	L	①	52.3		54.2		53.2		52.3
		②	52.9		54.8		53.3		52.3
		③	52.9		55.1		54		53.2
	M	①	50.2		50.1		49.8		48.8
		②	50.5		50.2		50.3		49.1
		③	51.1		50.9		50.5		49.7
	U	①	50.8		50.5		49.6		49
		②	50.9		50.6		49.8		49.2
		③	51.6		51.6		50.6		49.7

## Sheet: Yield
yield t/hm2	2016	yield
	CT0	9.99	①
		10.15	②
		10.22	③
	SS0	10.54	①
		10.65	②
		10.67	③
	RT0	9.87	①
		9.94	②
		10.04	③
	ZT0	8.43	①
		8.53	②
		8.57	③
	CTS	10.13	①
		10.19	②
		10.31	③
	SSS	10.73	①
		10.82	②
		10.85	③
	RTS	10.01	①
		10.8	②
		10.18	③
	ZTS	8.55	①
		8.64	②
		8.67	③
	2017	yield
	CT0	11.68	①
		11.79	②
		11.84	③
	SS0	12.89	①
		13.03	②
		13.11	③
	RT0	10.08	①
		10.19	②
		10.24	③
	ZT0	9.78	①
		9.87	②
		9.9	③
	CTS	13.47	①
		13.55	②
		13.57	③
	SSS	13.45	①
		13.59	②
		13.64	③
	RTS	11.19	①
		11.39	②
		13.47	③
	ZTS	10.85	①
		10.97	②
		11.09	③
